# Supplementary material
Source: ML conference proceedings conference paper supplement (https://proceedings.mlr.press/v176/turian22a.html)
Supplement: Supplementary file [file turian22a-supp.pdf]

Table 2: Summary of the 19 evaluation tasks of HEAR. Includes the embedding type (timestamp (T) or scene (S)), the predictor type (multiclass (C) or multilabel (L)), the split method used during downstream evaluation (train/validation/test (TVT) or  $K$ -fold), the duration of clips in seconds, the total number of clips for each task, the primary evaluation metric, and whether or not the task is novel. Novel tasks are not comparable to the literature. For all tasks except FSD50k, clips were standardized to one length using padding or trimming, typically the 95th percentile length in the original corpus.

| Task Name                | Embed Type | Predictor Type | Split Method | Duration (seconds) | # clips | Evaluation Metric | Novel |
|--------------------------|------------|----------------|--------------|--------------------|---------|-------------------|-------|
| <b>Open Tasks</b>        |            |                |              |                    |         |                   |       |
| DCASE 2016 Task 2        | T          | L              | TVT          | 120.0              | 72      | Onset FMS         | ✓     |
| NSynth Pitch 5hr         | S          | C              | TVT          | 4.0                | 5000    | Pitch Acc.        | ✓     |
| NSynth Pitch 50hr        | S          | C              | TVT          | 4.0                | 49060   | Pitch Acc.        | ✓     |
| Speech Commands 5hr      | S          | C              | TVT          | 1.0                | 22890   | Accuracy          | ✓     |
| Speech Commands Full     | S          | C              | TVT          | 1.0                | 100503  | Accuracy          |       |
| <b>Secret Tasks</b>      |            |                |              |                    |         |                   |       |
| Beehive States           | S          | C              | TVT          | 600.0              | 576     | AUCROC            |       |
| Beijing Opera Percussion | S          | C              | 5-fold       | 4.77               | 236     | Accuracy          | ✓     |
| CREMA-D                  | S          | C              | 5-fold       | 5.0                | 7438    | Accuracy          |       |
| ESC-50                   | S          | C              | 5-fold       | 5.0                | 2000    | Accuracy          |       |
| FSD50K                   | S          | L              | TVT          | 0.3 - 30.0         | 51185   | mAP               |       |
| Gunshot Triangulation    | S          | C              | 7-fold       | 1.5                | 88      | Accuracy          | ✓     |
| GTZAN Genre              | S          | C              | 10-fold      | 30.0               | 1000    | Accuracy          |       |
| GTZAN Music Speech       | S          | C              | 10-fold      | 30.0               | 128     | Accuracy          |       |
| LibriCount               | S          | C              | 5-fold       | 5.0                | 5720    | Accuracy          |       |
| MAESTRO 5hr              | T          | L              | 5-fold       | 120.0              | 185     | Onset FMS         | ✓     |
| Mridangam Stroke         | S          | C              | 5-fold       | 0.81               | 6977    | Accuracy          | ✓     |
| Mridangam Tonic          | S          | C              | 5-fold       | 0.81               | 6977    | Accuracy          | ✓     |
| Vocal Imitations         | S          | C              | 3-fold       | 11.26              | 5601    | mAP               | ✓     |
| VoxLingua107 Top10       | S          | C              | 5-fold       | 18.64              | 972     | Accuracy          | ✓     |

## Appendix A. Evaluation Tasks

Our 19 tasks were derived from 16 datasets, as described in more detail below. Tasks described as “novel” are not comparable to the literature. A summary of task statistics is available in Table 2.

**Speech Commands (version 2), 5h and full** Classification of known spoken commands, with additional categories for silence and unknown commands (Warden, 2018). As per the literature, models are evaluated by prediction accuracy. We also provide a 5-hour subset of the training data. We use the predefined train and test split, and note that the test data has a different distribution of labels from the training data.

**NSynth Pitch, 5h and 50h** NSynth Pitch is a novel multiclass classification problem. The goal of this task is to classify instrumental sounds from the NSynth Dataset (Engel et al., 2017) into one of 88 pitches. Results for this task are measured by pitch accuracy, as well as chroma accuracy. Chroma accuracy considers only the pitch “class” i.e., pitches

that are a multiple-of-octaves apart are considered equivalent. For HEAR we created two versions of this dataset: a 5 hour and 50 hour version. Unlike Carr et al. (2021), we treat this as a classification, not regression problem.

**DCASE 2016 Task 2** A novel office sound event detection in synthesized scenes, adapted from DCASE 2016 Task 2 (Mesaros et al., 2018). Novel, insofar as our evaluation uses different splits. The original imbalanced splits did not work well our generic cross-validation.

Postprocessing: Predictions were postprocessed using 250 ms median filtering. At each validation step, a minimum event duration of 125 or 250 ms was chosen to maximize onset-only event-based F-measure (with 200 ms tolerance). Scores were computed using `sed_eval` (Mesaros et al., 2016).

**Beehive States** This is a binary classification task using audio recordings of two beehives (Nolasco et al., 2019). The beehives are in one of two states: a normal state, and one in which the queen bee is missing (“queen-less”). At 10 minutes long, this task has the longest audio clips in HEAR.

**Beijing Opera Percussion** This is a novel audio classification task developed using the Beijing Opera Percussion Instrument Dataset (Tian et al., 2014). The Beijing Opera uses six main percussion instruments that can be classified into four main categories: Bangu, Naobo, Daluo, and Xiaoluo.

**CREMA-D** CREMA-D is a dataset for emotion recognition (Cao et al., 2014). The original dataset contains audiovisual data of actors reciting sentences with one of six different emotions (anger, disgust, fear, happy, neutral and sad). For HEAR, we only use the audio recordings (which differs from much but not all of the literature).

**ESC-50** This is a multiclass classification task on environmental sounds. The ESC-50 dataset is a collection of 2000 environmental sounds organized into 50 classes (Piczak, 2015). Scores are averaged over 5 folds. (The folds are predefined in the original dataset.)

**FSD50K** FSD50K is a multilabel task (Fonseca et al., 2020). This dataset contains over 100 hours of human-labeled sound events from Freesound (<https://freesound.org/>). Each of the  $\approx 51$  k audio clips is labeled using one or more of 200 classes from the AudioSet Ontology, encompassing environmental sounds, speech, and music. Unlike the other datasets, for FSD50K scene embeddings we did not alter the audio clip length. Each clip is between 0.3 and 30 seconds long. We use the predefined train/val/eval split. Evaluation is done using mean average precision (mAP).

**Gunshot Triangulation** Gunshot triangulation is a novel resource multiclass classification task that utilizes a unique dataset: gunshots recorded in an open field using iPod Touch devices (Cooper and Shaw, 2020). This data consist of 22 shots from 7 different firearms, for a total of 88 audio clips, the smallest dataset in HEAR. Each shot is recorded using four different iPod Touches, located at different distances from the shooter. The goal of this task is to classify audio by the iPod Touch that recorded it, i.e., to identify the location of the microphone. The dataset was split into 7 different folds, where each firearm belonged to only one fold. Results are averaged over each fold.

**GTZAN Genre** The GTZAN Genre Collection (Tzanetakis and Cook, 2002) is a dataset of 1000 audio tracks (each 30 seconds in duration) that are categorized into ten genres (100 tracks per genre). The task is multiclass classification. As per the literature, scores are averaged over 10 folds. However, we don’t used the corrected artist-conditional splits from (Sturm, 2013).

**GTZAN Music Speech** **GTZAN Music Speech** is a binary classification task, where the goal is to distinguish between music and speech. The dataset consists of 120 tracks (each 30 seconds in duration) and each class (music/speech) has 60 examples.

**LibriCount** LibriCount is a multiclass speaker count identification task (Stöter et al., 2018b). The dataset contains audio of a simulated cocktail party environment with between 0 to 10 speakers. The goal of this task is to classify how many speakers are present in each of the recordings. Following Stöter et al. (2018a), we treat this as a classification, not regression, problem.

**MAESTRO 5h** This is a novel music transcription task adapted from MAESTRO. For HEAR, we created a subsampled version that includes 5 hours of training and validation audio, in 120 second clips. To evaluate submissions, a shallow transcription model was trained on timestamp-based embeddings provided by the participant models.

We use note onset FMS and note onset with offset FMS for evaluation, as per the original MAESTRO paper (Hawthorne et al., 2019) and the preceding Onsets and Frames paper (Hawthorne et al., 2018).

Note onset measures the ability of the model to estimate note onsets with 50 ms tolerance and ignores offsets. Note onset w/ offset includes onsets as well as requires note duration within 20% of ground truth or within 50 ms, whichever is greater.

**Mridingham Stroke and Mridingham Tonic** We used the Mridangam Stroke Dataset (Anantapadmanabhan et al., 2013) for two novel multiclass classification tasks: Stroke classification and Tonic classification. The Mridingam is a pitched percussion instrument used in carnatic music, which is a sub-genre of Indian classical music. This dataset comprises 10 different strokes played on Mridingams with 6 different tonics.

**Vocal Imitations** Vocal Imitations (Kim et al., 2018a) is a novel multiclass classification task, where the goal is to match a vocal imitation of a sound with the sound that is being imitated. The dataset contains 5601 vocal imitations of 302 reference sounds, organized by AudioSet ontology. Given a vocal sound, the classification task is to retrieve the original audio it is imitating.

**VoxLingua107 Top 10** This is a novel multiclass classification task derived from the VoxLingua107 dataset (Valk and Alumäe, 2021). The goal of the task is to identify the spoken language in an audio file. For HEAR we selected the top 10 most frequent languages from the development set, which resulted in just over 5 hours of audio over 972 audio clips.

## Appendix B. Downstream training details

For each task, using a given model’s frozen embeddings as input features, we train a downstream MLP classifier. For scene-based multiclass tasks, the final layer is a softmax with

Table 3: Properties of baseline and submitted models, including: whether the model processes raw audio (1-D) or spectrograms (2D); on what kind of data the model is pretrained; the number of million parameters; the size of the output embedding for scene and timestamp tasks; and the number of minutes the model spends embedding Speech Commands V2. We caution that embedding time is not the entire picture, if participants did not do simple speed optimizations. For example, the CREPE wrapper (also used by GURA) is known not to exploit GPU batch parallelism.

| Model                       | Input |    | Pretraining data |       |       | # M<br>params | Embed dim |      | Time<br>min |
|-----------------------------|-------|----|------------------|-------|-------|---------------|-----------|------|-------------|
|                             | 1D    | 2D | speech           | broad | music |               | scene     | time |             |
| OpenL3                      |       | ✓  |                  | ✓     |       | 4.7           | 512       | 512  | 94.9        |
| wav2vec2                    | ✓     |    | ✓                |       |       | 315.4         | 1024      | 1024 | 8.9         |
| CREPE                       | ✓     |    |                  |       | ✓     | 22.2          | 2048      | 2048 | 38.3        |
| AMAAI Lab wav2vec2+DDSP     | ✓     |    | ✓                |       | ✓     | 98.8          | 871       | 871  | 43.6        |
| AMAAI wav2vec2 music+speech | ✓     |    | ✓                |       | ✓     | 300.0         | 768       | 768  | 5.0         |
| CP-JKU PaSST 2lv1           |       | ✓  |                  | ✓     |       | 86.2          | 1295      | 2590 | 14.5        |
| CP-JKU PaSST 2lv1+mel       |       | ✓  |                  | ✓     |       | 86.2          | 1295      | 3358 | 5.8         |
| CP-JKU PaSST base           |       | ✓  |                  | ✓     |       | 86.2          | 1295      | 1295 | 5.8         |
| CVSSP PANNs                 |       | ✓  |                  | ✓     |       | 80.8          | 2048      | 2048 | 3.9         |
| Descript/MARL Wav2CLIP      |       | ✓  |                  | ✓     |       | 11.7          | 512       | 512  | 3.1         |
| GURA Avg H+w+C              | ✓     |    | ✓                |       | ✓     | 1339.0        | 1024      | 1024 | 40.0        |
| GURA Avg Hubert+Crepe       | ✓     |    | ✓                |       | ✓     | 1022.0        | 1024      | 1024 | 33.9        |
| GURA Avg Hubert+wav2vec2    | ✓     |    | ✓                |       |       | 634.0         | 1024      | 1024 | 14.6        |
| GURA Cat H+w+C              | ✓     |    | ✓                |       | ✓     | 1339.0        | 3072      | 3072 | 40.1        |
| GURA Cat Hubert+wav2vec2    | ✓     |    | ✓                |       |       | 634.0         | 2048      | 2048 | 14.4        |
| GURA Cat wav2vec2+crepe     | ✓     |    | ✓                |       | ✓     | 339.0         | 2048      | 2048 | 24.7        |
| GURA Fuse Cat H+w+C         | ✓     |    | ✓                |       | ✓     | 1339.0        | 3072      | 3072 | 40.1        |
| GURA Fuse Cat H+w+C (time)  | ✓     | ✓  |                  |       | ✓     | 1339.0        | 15360     | 3072 | 34.6        |
| GURA Fuse Hubert            | ✓     |    | ✓                |       |       | 1000.0        | 1280      | 1280 | 18.1        |
| GURA Fuse wav2vec2          | ✓     |    | ✓                |       |       | 317.0         | 1024      | 1024 | 8.8         |
| GURA Hubert                 | ✓     |    | ✓                |       |       | 1000.0        | 1280      | 1280 | 17.9        |
| IUT-CSE MLP (audio)         |       | ✓  | ✓                | ✓     | ✓     | 0.2           | 1584      | 8    | 2.9         |
| IUT-CSE MLP (keyword)       |       | ✓  | ✓                |       |       | 0.4           | 1024      | 64   | 3.0         |
| Logitech AI SERAB BYOL-S    |       | ✓  | ✓                |       |       | 5.3           | 2048      | 2048 | 4.8         |
| RedRice EfficientNet-B2     |       | ✓  |                  | ✓     |       | 7.7           | 1408      | 1408 | 3.4         |
| Sony UDONS ViT              |       | ✓  | ✓                |       |       | 11.1          | 768       | 768  | 3.5         |
| Soundsensing YAMNet         |       | ✓  |                  | ✓     |       | 3.8           | 1024      | 1024 | 15.7        |
| Stellenbosch LSL DBERT      | ✓     |    | ✓                |       |       | 316.8         | 2048      | 2048 | 6.5         |

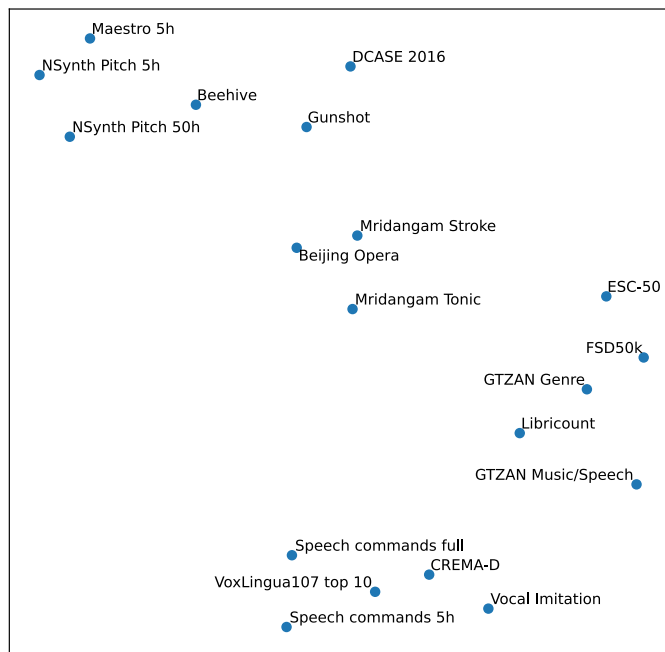

(a) Tasks

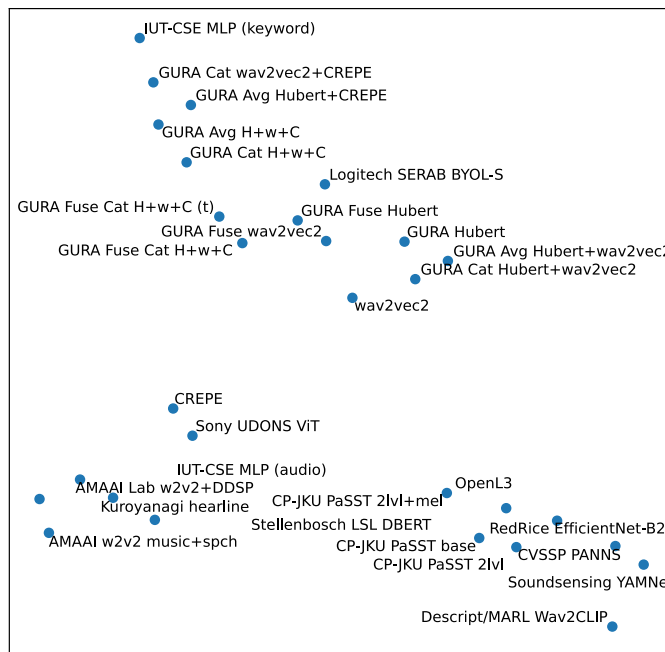

(b) Models

Figure 2: t-SNE visualizations of tasks and models, based upon normalized scores. Missing normalized scores were imputed using sklearn’s multivariate IterativeImputer.

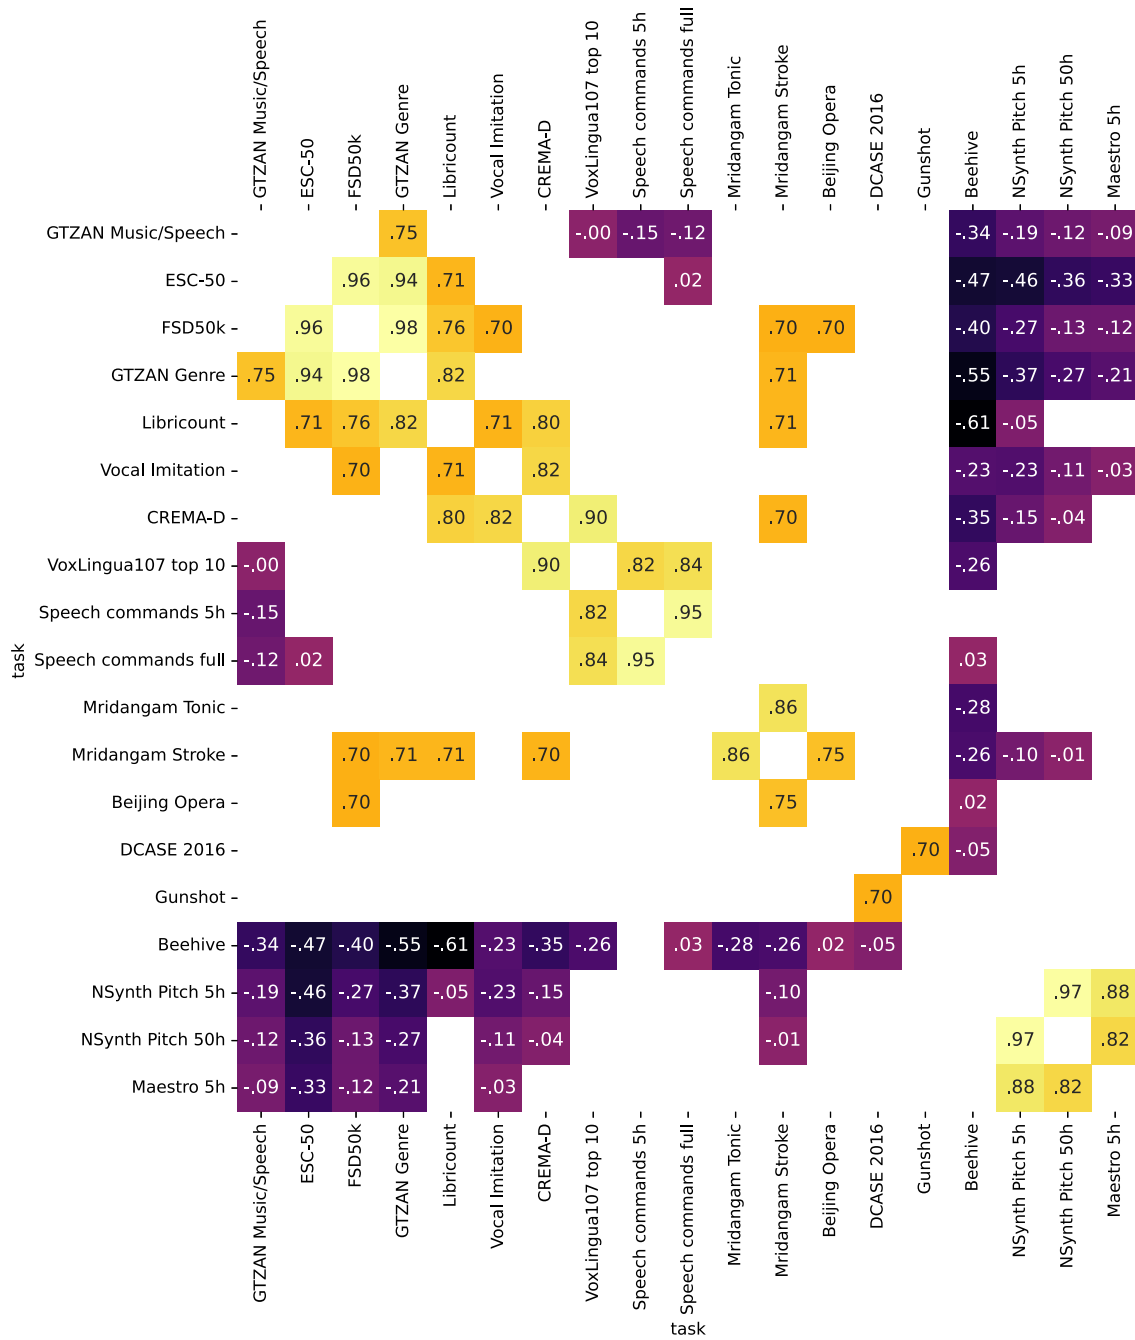

Figure 3: Task versus task correlation scores, based upon normalized scores. Only the highest and lowest correlations are displayed. Cells are sorted to minimize the traveling salesperson distance, mapping correlations  $[-1, +1]$  to distances  $[+2, 0]$ .

# HEAR: HOLISTIC EVALUATION OF AUDIO REPRESENTATIONS

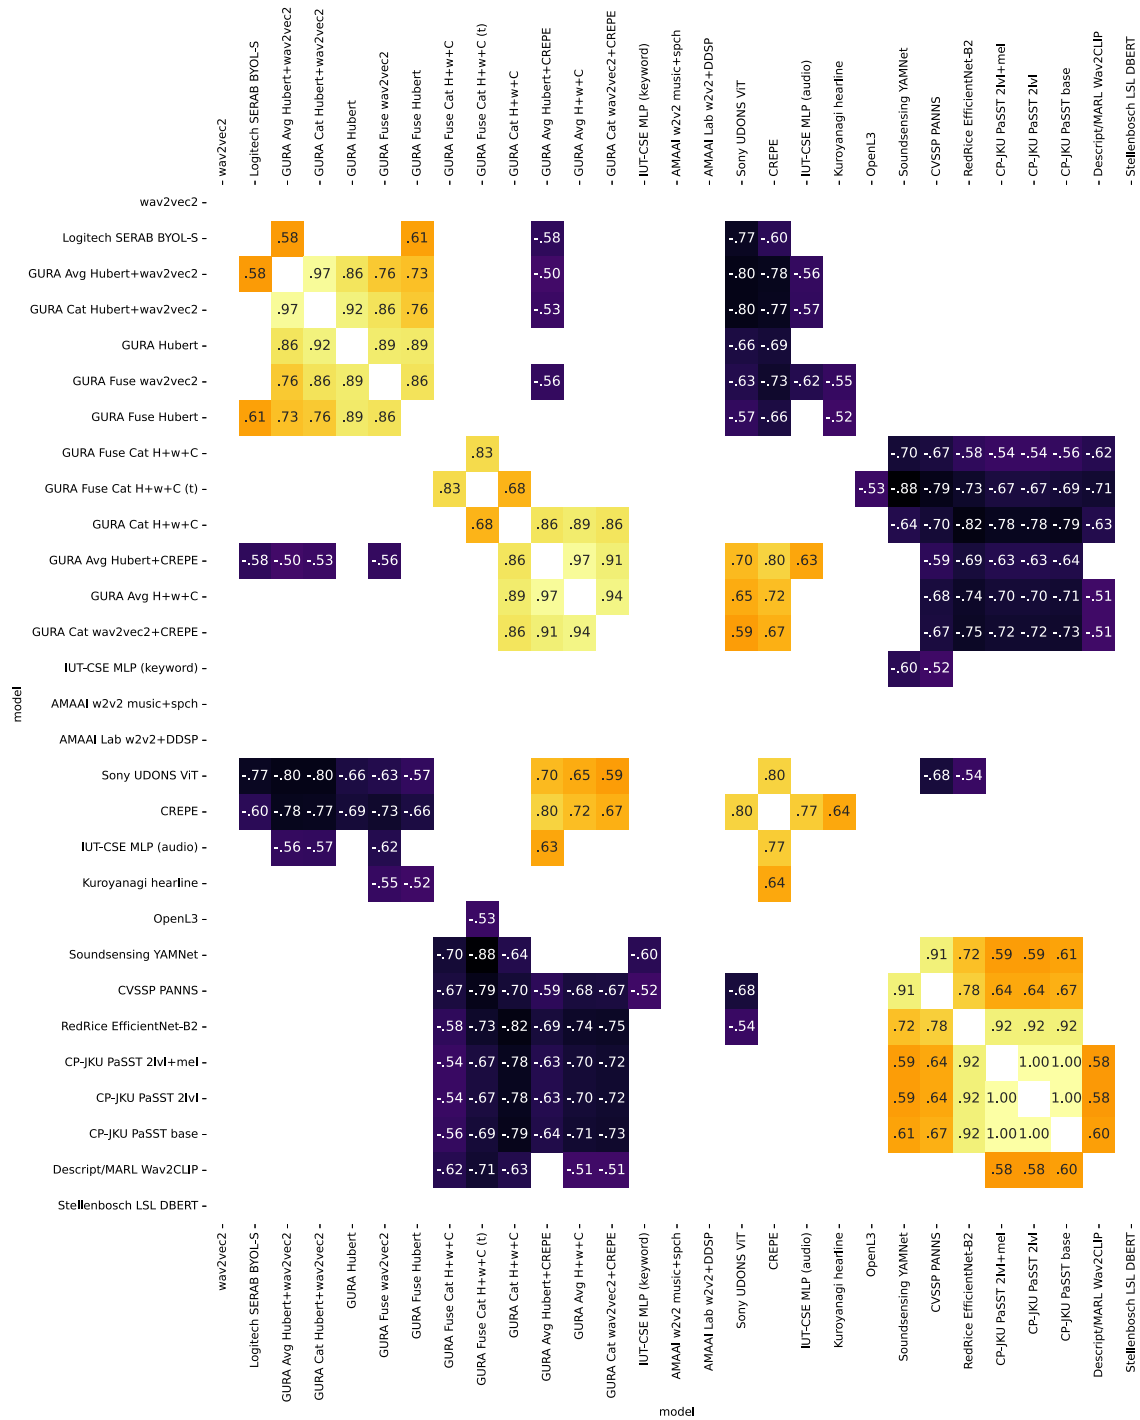

Figure 4: Model versus model correlation scores, based upon normalized scores. Only the highest and lowest correlations are displayed. Cells are sorted to minimize the traveling salesperson distance, mapping correlations [-1, +1] to distances [+2, 0].

cross-entropy loss. For scene-based multilabel tasks and multilabel frame reductions of timestamp tasks, the final layer is a sigmoid with cross-entropy loss.

We monitor the score (not loss) on the validation set. For timestamp tasks, computing the validation score involves a full CPU-based `sed_eval` (Mesaros et al., 2016) run with median filter of 250ms and minimum event duration 125 ms and 250 ms. (Both event durations are tried at each validation step and the best hyperparameter is retained for that validation step.) We train for a maximum of 500 epochs, checking the validation score every 3 epochs, early stopping if no improvement is seen after 20 validation steps. For DCASE 2015 Task 2, we check the validation score every 10 epochs.

The validation score is used for early-stopping, as well as for model selection. The same RNG seed is used for every model-task downstream training, ensuring that grid points and weight initialization is identical. Model selection is performed over 8 deterministic random grid points out of 16 possible grid points. Hyperparameters are shown in Table 4. This grid was chosen after using a much larger hyperparameter grid with the three baseline models on the open tasks. In these preliminary hyperparameter grid pruning experiments, the grid was progressively refined by discarding hyperparameter choices that were not predictive of relatively high model performance, similarly to how Kelz et al. (2016) use tree ensemble learning to prune their hyperparameter grid.

Table 4: Hyperparameters used for training.

|                   |                                                           |
|-------------------|-----------------------------------------------------------|
| Hidden layers     | [1, 2]                                                    |
| Hidden dimensions | 1024                                                      |
| Dropout           | 0.1                                                       |
| Learning rate     | [3.2e-3, 1e-3, 3.2e-4, 1e-4]                              |
| Batch size        | 1024                                                      |
| Hidden norm       | Batch Norm                                                |
| Initialization    | [Xavier Uniform, Xavier Normal] (Glorot and Bengio, 2010) |
| Optimizer         | Adam                                                      |
